# Supplementary material
Source: HighWire-hosted journal article supplement (https://bmjopen.bmj.com/content/8/7/e018139)
Supplement: inline-supplementary-material-1 [file inline-supplementary-material-1.pdf]

Supplemental Tables

**Table S1**  
**Missing data analysis**

|                                         | <b>Not Missing</b><br>(n= 18,890) | <b>Missing</b><br>(n = 3,254) | <b>p-value</b> |
|-----------------------------------------|-----------------------------------|-------------------------------|----------------|
| <b>Age</b> (mean)                       | 48                                | 45                            | < 0.001        |
| <b>Gender</b> (male)                    | 48                                | 53                            | < 0.001        |
| <b>Race</b>                             |                                   |                               |                |
| White non-Hispanic                      | 83                                | 72                            | <0.001         |
| African American                        | 10                                | 15                            | <0.001         |
| Hispanic                                | 2                                 | 5                             | <0.001         |
| Other                                   | 5                                 | 6                             | 0.30           |
| <b>Married</b>                          | 55                                | 51                            | <0.01          |
| <b>Education</b> (Highest level)        |                                   |                               |                |
| Non High School Graduate                | 12                                | 17                            | <0.001         |
| High School Graduate                    | 62                                | 62                            | 0.90           |
| College Graduate                        | 26                                | 21                            | <0.001         |
| <b>Employment</b>                       |                                   |                               |                |
| Unemployed/Student                      | 24                                | 27                            | 0.01           |
| Employed                                | 58                                | 55                            | 0.07           |
| Retired                                 | 18                                | 17                            | 0.47           |
| <b>Comorbidity</b>                      |                                   |                               |                |
| Depression                              | 19                                | 17                            | 0.08           |
| DM                                      | 10                                | 11                            | 0.31           |
| COPD                                    | 7                                 | 9                             | 0.02           |
| CAD                                     | 5                                 | 4                             | 0.34           |
| Alcohol Misuse                          | 15                                | 15                            | 0.93           |
| <b>Perceived Health</b>                 |                                   |                               |                |
| Fair/Poor                               | 18                                | 20                            | <0.01          |
| <b>Coverage/Utilization</b>             |                                   |                               |                |
| No Primary Physician                    | 22                                | 29                            | <0.001         |
| No Insurance Coverage                   | 9                                 | 14                            | <0.001         |
| Delay Care Due to Cost                  | 13                                | 16                            | 0.04           |
| Delay Care for Non-Cost                 | 13                                | 15                            | 0.18           |
| <b>Reason</b>                           |                                   |                               |                |
| Any Reason for Delay in Care            | 22                                | 28                            | <0.001         |
| <b>Lack of Perceived Social Support</b> | 18                                | 16                            | 0.56           |

**Table S2**

Differences between participants in the 2013-2014 BRFSS sample who were and were not assigned social support and treatment delay modules

|                                  | <b>Not assigned social<br/>support and<br/>treatment delay<br/>modules<br/>(n = 934,203)</b> | <b>Assigned social<br/>support and<br/>treatment delay<br/>modules<br/>(n = 22,234)</b> |
|----------------------------------|----------------------------------------------------------------------------------------------|-----------------------------------------------------------------------------------------|
| <b>Age</b> (mean)                | 47                                                                                           | 47                                                                                      |
| <b>Gender</b> (male, %)          | 49                                                                                           | 49                                                                                      |
| <b>Race</b>                      |                                                                                              |                                                                                         |
| White non-Hispanic               | 81                                                                                           | 64                                                                                      |
| African American                 | 11                                                                                           | 12                                                                                      |
| Hispanic                         | 3                                                                                            | 16                                                                                      |
| Other                            | 6                                                                                            | 8                                                                                       |
| <b>Married</b>                   | 54                                                                                           | 51                                                                                      |
| <b>Education</b> (Highest level) |                                                                                              |                                                                                         |
| Non High School Graduate         | 13                                                                                           | 15                                                                                      |
| High School Graduate             | 62                                                                                           | 59                                                                                      |
| College Graduate                 | 25                                                                                           | 26                                                                                      |
| <b>Employment</b>                |                                                                                              |                                                                                         |
| Unemployed/Student               | 24                                                                                           | 27                                                                                      |
| Employed                         | 58                                                                                           | 56                                                                                      |
| Retired                          | 18                                                                                           | 17                                                                                      |
| <b>Comorbidity</b>               |                                                                                              |                                                                                         |
| Depression                       | 19                                                                                           | 18                                                                                      |
| DM                               | 10                                                                                           | 10                                                                                      |
| COPD                             | 7                                                                                            | 7                                                                                       |
| CAD                              | 5                                                                                            | 4                                                                                       |
| Alcohol Misuse                   | 15                                                                                           | 17                                                                                      |
| <b>Perceived Health</b>          |                                                                                              |                                                                                         |
| Fair/Poor                        | 18                                                                                           | 18                                                                                      |
| <b>Social Network</b>            |                                                                                              |                                                                                         |
| Single adult household           | 22                                                                                           | 19                                                                                      |
| <b>Coverage/Utilization</b>      |                                                                                              |                                                                                         |
| No Primary Physician             | 23                                                                                           | 23                                                                                      |
| No Insurance Coverage            | 10                                                                                           | 12                                                                                      |
| Delay Care Due to Cost           | 14                                                                                           | 15                                                                                      |
| Delay Care for Non-Cost Reason   | 14                                                                                           | 20                                                                                      |
| Any Reason for Delay in Care     | 23                                                                                           | 34                                                                                      |

**TABLE S3**  
**Baseline Characteristics of Tennessee Respondents**

|                                 | <b>Overall</b><br>(N= 3,773) | <b>With Support</b><br>(N= 2,908) | <b>No Support</b><br>(N= 865) | <b>P value</b> |
|---------------------------------|------------------------------|-----------------------------------|-------------------------------|----------------|
| <b>Age (mean)</b>               | 48                           | 48                                | 48                            |                |
| <b>Gender (male)</b>            | 1,768 (47)                   | 1,302 (45)                        | 466 (54)                      | <0.001         |
| <b>Race/Ethnicity</b>           |                              |                                   |                               |                |
| White Non-Hispanic              | 2,998 (79)                   | 2,374 (82)                        | 624 (72)                      | <0.001         |
| African American                | 554 (15)                     | 367 (13)                          | 187 (22)                      | <0.001         |
| Hispanic                        | 41 (1)                       | 39 (1)                            | 2 (<1)                        | 0.03           |
| Other                           | 180 (5)                      | 127 (4)                           | 53 (6)                        | 0.30           |
| <b>Married</b>                  | 2,032 (54)                   | 1,654 (57)                        | 379 (43)                      | <0.001         |
| <b>Single Adult Household *</b> | 490 (23)                     | 361 (21)                          | 129 (29)                      | <0.001         |
| <b>Education</b>                |                              |                                   |                               |                |
| Non-High School Grad            | 574 (15)                     | 373 (13)                          | 202 (23)                      | <0.001         |
| High School Grad                | 2,354 (63)                   | 1,801 (62)                        | 552 (64)                      | 0.40           |
| College Grad                    | 835 (22)                     | 729 (25)                          | 106 (12)                      | <0.001         |
| <b>Employment</b>               |                              |                                   |                               |                |
| Unemployed/Student              | 1,103 (29)                   | 774 (21)                          | 329 (38)                      | <0.001         |
| Employed                        | 1,954 (52)                   | 1,555 (53)                        | 399 (46)                      | <0.01          |
| Retired                         | 708 (19)                     | 572 (20)                          | 137 (16)                      | 0.02           |
| <b>Comorbidity</b>              |                              |                                   |                               |                |
| Depression                      | 747 (20)                     | 438 (15)                          | 309 (36)                      | <0.001         |
| Diabetes                        | 462 (12)                     | 332 (11)                          | 130 (15)                      | 0.02           |
| COPD                            | 346 (9)                      | 215 (7)                           | 131 (15)                      | <0.001         |
| CAD                             | 252 (7)                      | 176 (6)                           | 76 (9)                        | 0.02           |
| Alcohol Misuse                  | 355 (10)                     | 265 (9)                           | 90 (11)                       | 0.42           |
| <b>Perceived Health</b>         |                              |                                   |                               |                |
| Fair/Poor                       | 865 (23)                     | 525 (18)                          | 341 (40)                      | <0.001         |
| <b>Access</b>                   |                              |                                   |                               |                |
| No PCP                          | 783 (21)                     | 559 (19)                          | 224 (26)                      | <0.01          |
| Uninsured                       | 638 (17)                     | 414 (14)                          | 223 (26)                      | <0.001         |
| <b>Delay</b>                    |                              |                                   |                               |                |
| Delay Cost                      | 664 (18)                     | 415 (14)                          | 249 (29)                      | <0.001         |
| Delay Non-Cost                  | 552 (15)                     | 361 (12)                          | 192 (22)                      | <0.001         |
| Delay†                          | 1,014 (27)                   | 669 (23)                          | 345 (40)                      | <0.001         |

All data weighted according to BRFSS formula. Multiplication by 1,000 gives weighted N. Total weighted N= 3,773,000

\* large proportion of missing data (50%) for single adult household status

† respondents reported both cost and non-cost reasons for delaying care, therefore total number of delays is less sum of cost and non-cost delays

**TABLE S4**

**Baseline Characteristics of Minnesota Respondents**

|                               | <b>Overall</b><br>(N= 3,686) | <b>With Support</b><br>(N= 3,179) | <b>No Support</b><br>(N= 507) | <b>P value</b> |
|-------------------------------|------------------------------|-----------------------------------|-------------------------------|----------------|
| <b>Age (mean)</b>             | 47                           | 47                                | 46                            |                |
| <b>Gender (male)</b>          | 1,782 (48)                   | 1,510 (47)                        | 273 (54)                      | <0.001         |
| <b>Race/Ethnicity</b>         |                              |                                   |                               |                |
| White Non-Hispanic            | 3,160 (86)                   | 2,793 (88)                        | 367 (72)                      | <0.001         |
| African American              | 163 (4)                      | 111 (3)                           | 52 (10)                       | <0.001         |
| Hispanic                      | 142 (4)                      | 113 (4)                           | 30 (6)                        | <0.01          |
| Other                         | 221 (6)                      | 162 (5)                           | 58 (11)                       | <0.001         |
| <b>Married</b>                | 2,070 (56)                   | 1,872 (59)                        | 198 (39)                      | <0.001         |
| <b>Single Adult Household</b> | 314 (20)                     | 256 (18)                          | 58 (32)                       | <0.001         |
| *                             |                              |                                   |                               |                |
| <b>Education</b>              |                              |                                   |                               |                |
| Non-High School Grad          | 322 (9)                      | 237 (7)                           | 85 (17)                       | <0.001         |
| High School Grad              | 2,257 (61)                   | 1,929 (61)                        | 329 (65)                      | <0.01          |
| College Grad                  | 1,108 (30)                   | 1,014 (32)                        | 94 (18)                       | <0.001         |
| <b>Employment</b>             |                              |                                   |                               |                |
| Unemployed/Student            | 660 (18)                     | 525 (17)                          | 136 (27)                      | <0.001         |
| Employed                      | 2,387 (65)                   | 2,097 (66)                        | 290 (58)                      | <0.001         |
| Retired                       | 626 (17)                     | 548 (17)                          | 78 (15)                       | 0.07           |
| <b>Comorbidity</b>            |                              |                                   |                               |                |
| Depression                    | 684 (19)                     | 523 (16)                          | 161 (32)                      | <0.001         |
| Diabetes                      | 298 (8)                      | 249 (8)                           | 49 (10)                       | 0.03           |
| COPD                          | 161 (4)                      | 124 (4)                           | 37 (7)                        | <0.001         |
| CAD                           | 127 (3)                      | 107 (3)                           | 20 (4)                        | 0.20           |
| Alcohol Misuse                | 766 (21)                     | 670 (21)                          | 95 (19)                       | 0.07           |
| <b>Perceived Health</b>       |                              |                                   |                               |                |
| Fair/Poor                     | 437 (12)                     | 305 (10)                          | 132 (26)                      | <0.001         |
| <b>Access</b>                 |                              |                                   |                               |                |
| No PCP                        | 858 (23)                     | 699 (22)                          | 160 (32)                      | <0.001         |
| Uninsured                     | 5 (<1)                       | 5 (<1)                            | 1 (<1)                        | 0.60           |
| <b>Delay</b>                  |                              |                                   |                               |                |
| Delay Cost                    | 331 (9)                      | 228 (7)                           | 103 (20)                      | <0.001         |
| Delay Non-Cost                | 444 (12)                     | 325 (10)                          | 119 (23)                      | <0.001         |
| Delay†                        | 659 (18)                     | 484 (15)                          | 175 (34)                      | <0.001         |

All data weighted according to BRFSS formula. Multiplication by 1,000 gives weighted N. Total weighted N= 3,686,000

\* large proportion of missing data (50%) for single adult household status

† respondents reported both cost and non-cost reasons for delaying care, therefore total number of delays is less sum of cost and non-cost delays

**Table S5**

### Reasons for Delaying Medical Care Among Tennessee Respondents

| Reason for delaying care         | Overall<br>(N= 1,014) | With Support<br>(N= 669) | Without Support<br>(N= 345) | P-value |
|----------------------------------|-----------------------|--------------------------|-----------------------------|---------|
| Cost                             | 664 (65)              | 415 (62)                 | 249 (72)                    | <0.001  |
| Couldn't reach office on phone   | 3 (<1)                | 2 (<1)                   | 1 (<1)                      | 0.50    |
| Couldn't get timely appointment  | 115 (11)              | 72 (11)                  | 44 (13)                     | <0.01   |
| Too long of wait in waiting room | 56 (6)                | 36 (5)                   | 20 (6)                      | 0.046   |
| Office Closed                    | 14 (1)                | 12 (2)                   | 2 (1)                       | 0.32    |
| No transportation                | 85 (8)                | 63 (9)                   | 22 (6)                      | 0.56    |
| Other Reason                     | 279 (28)              | 176 (26)                 | 103 (30)                    | <0.001  |

Weighted Data. Multiplication by 1,000 gives weighted frequency (N). Total Weighted N Delays = 1,014,000

Patients who delayed care due to cost could also report one additional reason for delaying medical care, therefore percentages for reasons for delay in care are greater than total percentage of patients who delayed care.

**Table S6**  
**Multivariate Modeling Tennessee**

|                                    | <b>Model 1</b> | <b>95% CI</b> | <b>p-value</b> | <b>Model 5</b> | <b>95% CI</b> | <b>p-value</b> |
|------------------------------------|----------------|---------------|----------------|----------------|---------------|----------------|
| <b><i>Social Support</i></b>       |                |               |                |                |               |                |
| Good Social Support                | 1.00           | n/a           | n/a            | 1.00           | n/a           | n/a            |
| Poor Social Support                | 2.22           | 1.78-2.77     | <0.001         | 1.50           | 1.16-1.94     | <0.01          |
| <b><i>Demographics</i></b>         |                |               |                |                |               |                |
| <b>Age</b>                         |                |               |                | 1.01           | 1.00-1.02     | 0.04           |
| <b>Gender (Male)</b>               |                |               |                | 0.60           | 0.47-0.76     | <0.001         |
| <b>Race</b>                        |                |               |                |                |               |                |
| White non-Hispanic                 |                |               |                | 1.00           | n/a           | n/a            |
| AA                                 |                |               |                | 1.22           | 0.88-1.70     | 0.22           |
| Hispanic                           |                |               |                | 1.06           | 0.26-4.35     | 0.94           |
| Other                              |                |               |                | 0.93           | 0.48-1.80     | 0.84           |
| <b>Marital Status (married)</b>    |                |               |                | 0.95           | 0.76-1.20     | 0.68           |
| <b><i>Socioeconomic Status</i></b> |                |               |                |                |               |                |
| <b>Education (Highest Level)</b>   |                |               |                |                |               |                |
| Non High School                    |                |               |                | 1.00           | n/a           | n/a            |
| Graduate                           |                |               |                |                |               |                |
| High School Graduate               |                |               |                | 0.71           | 0.49-1.03     | 0.07           |
| College Graduate                   |                |               |                | 0.81           | 0.52-1.25     | 0.34           |
| <b>Employment</b>                  |                |               |                |                |               |                |
| Employed                           |                |               |                | 1.00           | n/a           | n/a            |
| Unemployed/Student                 |                |               |                | 1.08           | 0.83-1.41     | 0.57           |
| Retired                            |                |               |                | 0.45           | 0.31-0.64     | <0.001         |
| <b><i>Health Factors</i></b>       |                |               |                |                |               |                |
| <b>Comorbidity</b>                 |                |               |                |                |               |                |
| Depression                         |                |               |                | 2.00           | 1.56-2.56     | <0.001         |
| DM                                 |                |               |                | 1.29           | 0.93-1.78     | 0.12           |
| COPD                               |                |               |                | 1.44           | 1.01-2.06     | 0.04           |
| CAD                                |                |               |                | 1.08           | 0.70-1.65     | 0.73           |
| Alcohol Misuse                     |                |               |                | 1.19           | 0.82-1.72     | 0.36           |
| <b>Perceived Health</b>            |                |               |                |                |               |                |
| Fair/Poor                          |                |               |                | 2.04           | 1.51-2.75     | <0.001         |
| <b><i>Access to Care</i></b>       |                |               |                |                |               |                |
| No Primary Physician               |                |               |                | 1.28           | 0.95-1.74     | 0.11           |
| No Insurance                       |                |               |                | 3.90           | 2.88-5.28     | <0.001         |

**Table S7**  
**Reasons for Delaying Medical Care Among Minnesota Respondents**

| <b>Reason for delaying care</b>  | <b>Overall<br/>(N=659)</b> | <b>With Support<br/>(N= 484)</b> | <b>Without Support<br/>(N= 175)</b> | <b>P-value</b> |
|----------------------------------|----------------------------|----------------------------------|-------------------------------------|----------------|
| Cost                             | 331 (50)                   | 228 (47)                         | 103 (59)                            | <0.001         |
| Couldn't reach office on phone   | 19 (3)                     | 14 (3)                           | 5 (3)                               | <0.01          |
| Couldn't get timely appointment  | 160 (24)                   | 125 (4)                          | 35 (20)                             | <0.001         |
| Too long of wait in waiting room | 60 (9)                     | 41 (26)                          | 19 (11)                             | <0.001         |
| Office Closed                    | 23 (3)                     | 17 (4)                           | 6 (3)                               | 0.01           |
| No transportation                | 88 (13)                    | 54 (11)                          | 34 (19)                             | <0.001         |
| Other Reason                     | 95 (14)                    | 74 (15)                          | 21 (12)                             | <0.001         |

Weighted Data. Multiplication by 1,000 gives weighted frequency (N). Total Weighted N Delays = 659,000

Patients who delayed care due to cost could also report one additional reason for delaying medical care, therefore percentages for reasons for delay in care are greater than total percentage of patients who delayed care.

**Table S8**  
**Multivariate Modeling Minnesota**

| <b><i>Social Support</i></b>       | <b>Model 1</b> | <b>95% CI</b> | <b>p-value</b> | <b>Model 5</b> | <b>95% CI</b> | <b>p-value</b> |
|------------------------------------|----------------|---------------|----------------|----------------|---------------|----------------|
| Good Social Support                | 1.00           | n/a           | n/a            | 1.00           | n/a           | n/a            |
| Poor Social Support                | 2.93           | 2.55-3.36     | <0.001         | 2.16           | 1.83-2.56     | <0.001         |
| <b><i>Demographics</i></b>         |                |               |                |                |               |                |
| <b>Age</b>                         |                |               |                | 1.01           | 1.01-1.02     | <0.001         |
| <b>Gender (Male)</b>               |                |               |                | 0.66           | 0.58-0.75     | <0.001         |
| <b>Race</b>                        |                |               |                |                |               |                |
| White non-Hispanic                 |                |               |                | 1.00           | n/a           | n/a            |
| AA                                 |                |               |                | 0.58           | 0.42-0.80     | <0.001         |
| Hispanic                           |                |               |                | 1.44           | 1.00-2.06     | 0.05           |
| Other                              |                |               |                | 1.08           | 0.56-1.68     | 0.73           |
| <b>Marital Status (married)</b>    |                |               |                | 0.88           | 0.77-0.99     | 0.04           |
| <b><i>Socioeconomic Status</i></b> |                |               |                |                |               |                |
| <b>Education (Highest Level)</b>   |                |               |                |                |               |                |
| Non High School                    |                |               |                | 1.00           | n/a           | n/a            |
| Graduate                           |                |               |                |                |               |                |
| High School Graduate               |                |               |                | 0.98           | 0.71-1.35     | 0.90           |
| College Graduate                   |                |               |                | 0.97           | 0.71-1.35     | 0.83           |
| <b>Employment</b>                  |                |               |                |                |               |                |
| Employed                           |                |               |                | 1.00           | n/a           | n/a            |
| Unemployed/Student                 |                |               |                | 1.09           | 0.92-1.29     | 0.33           |
| Retired                            |                |               |                | 0.58           | 0.48-0.71     | <0.001         |
| <b><i>Health Factors</i></b>       |                |               |                |                |               |                |
| <b>Comorbidity</b>                 |                |               |                |                |               |                |
| Depression                         |                |               |                | 2.02           | 1.75-2.32     | <0.001         |
| DM                                 |                |               |                | 1.07           | 0.86-1.33     | 0.56           |
| COPD                               |                |               |                | 1.70           | 1.35-2.15     | <0.001         |
| CAD                                |                |               |                | 0.88           | 0.65-1.20     | 0.42           |
| Alcohol Misuse                     |                |               |                | 1.14           | 0.98-1.33     | 0.10           |
| <b>Perceived Health</b>            |                |               |                |                |               |                |
| Fair/Poor                          |                |               |                | 2.21           | 1.85-2.64     | <0.001         |
| <b><i>Access to Care</i></b>       |                |               |                |                |               |                |
| No Primary Physician               |                |               |                | 1.10           | 0.93-1.29     | 0.27           |
| No Insurance                       |                |               |                | 1.75           | 0.41-7.53     | 0.45           |

95% confidence intervals and p-values given refer to model 5
